# Supplementary material for: Epidemiological Tracking and Population Assignment of the Non-Clonal Bacterium, Burkholderia pseudomallei
Source: PubMed Central journal article supplement (PMC3236730; doi:10.1371/journal.pntd.0001381), 2011-12-13

A

| $K$  | $\ln P(D)$ or $L(K)$ | Variance of $L(K)$ given by <i>Structure</i> | Standard Deviation of $L(K)$ | First order rate of change ( $L'(K)$ ) | Second order rate of change ( $L''(K)$ ) | $\Delta K$ |
|------|----------------------|----------------------------------------------|------------------------------|----------------------------------------|------------------------------------------|------------|
| 1    | -8272.8              | 98.60                                        | 0                            | n/a                                    | n/a                                      | n/a        |
| 1    | -8272.8              | 99.00                                        |                              |                                        |                                          |            |
| 1    | -8272.8              | 98.50                                        |                              |                                        |                                          |            |
| Mean | -8272.80             |                                              |                              |                                        |                                          |            |
| 2    | -7155.4              | 265.30                                       | 0.351188458                  | 1117.43                                | 521.1333333                              | 1483.914   |
| 2    | -7155.7              | 270.60                                       |                              |                                        |                                          |            |
| 2    | -7155                | 265.10                                       |                              |                                        |                                          |            |
| Mean | -7155.37             |                                              |                              |                                        |                                          |            |
| 3    | -6889.20             | 450.60                                       | 579.7933885                  | 596.30                                 | 668                                      | 1.152135   |
| 3    | -6898.40             | 584.80                                       |                              |                                        |                                          |            |
| 3    | -5889.60             | 442.30                                       |                              |                                        |                                          |            |
| Mean | -6559.07             |                                              |                              |                                        |                                          |            |
| 4    | -6635.5              | 751.70                                       | 4.110150039                  | -71.70                                 | 60.76666667                              | 14.78454   |
| 4    | -6628.1              | 684.60                                       |                              |                                        |                                          |            |
| 4    | -6628.7              | 705.90                                       |                              |                                        |                                          |            |
| Mean | -6630.77             |                                              |                              |                                        |                                          |            |
| 5    | -6641.40             | 990.20                                       | 2.762245467                  | -10.93                                 | 213.2                                    | 77.18358   |
| 5    | -6639.10             | 932.30                                       |                              |                                        |                                          |            |
| 5    | -6644.6              | 849.30                                       |                              |                                        |                                          |            |
| Mean | -6641.70             |                                              |                              |                                        |                                          |            |
| 6    | -6484.7              | 1037.20                                      | 76.42096135                  | 202.27                                 | n/a                                      | n/a        |
| 6    | -6351.20             | 1559.10                                      |                              |                                        |                                          |            |
| 6    | -6482.40             | 972.80                                       |                              |                                        |                                          |            |
| Mean | -6439.43             |                                              |                              |                                        |                                          |            |

B

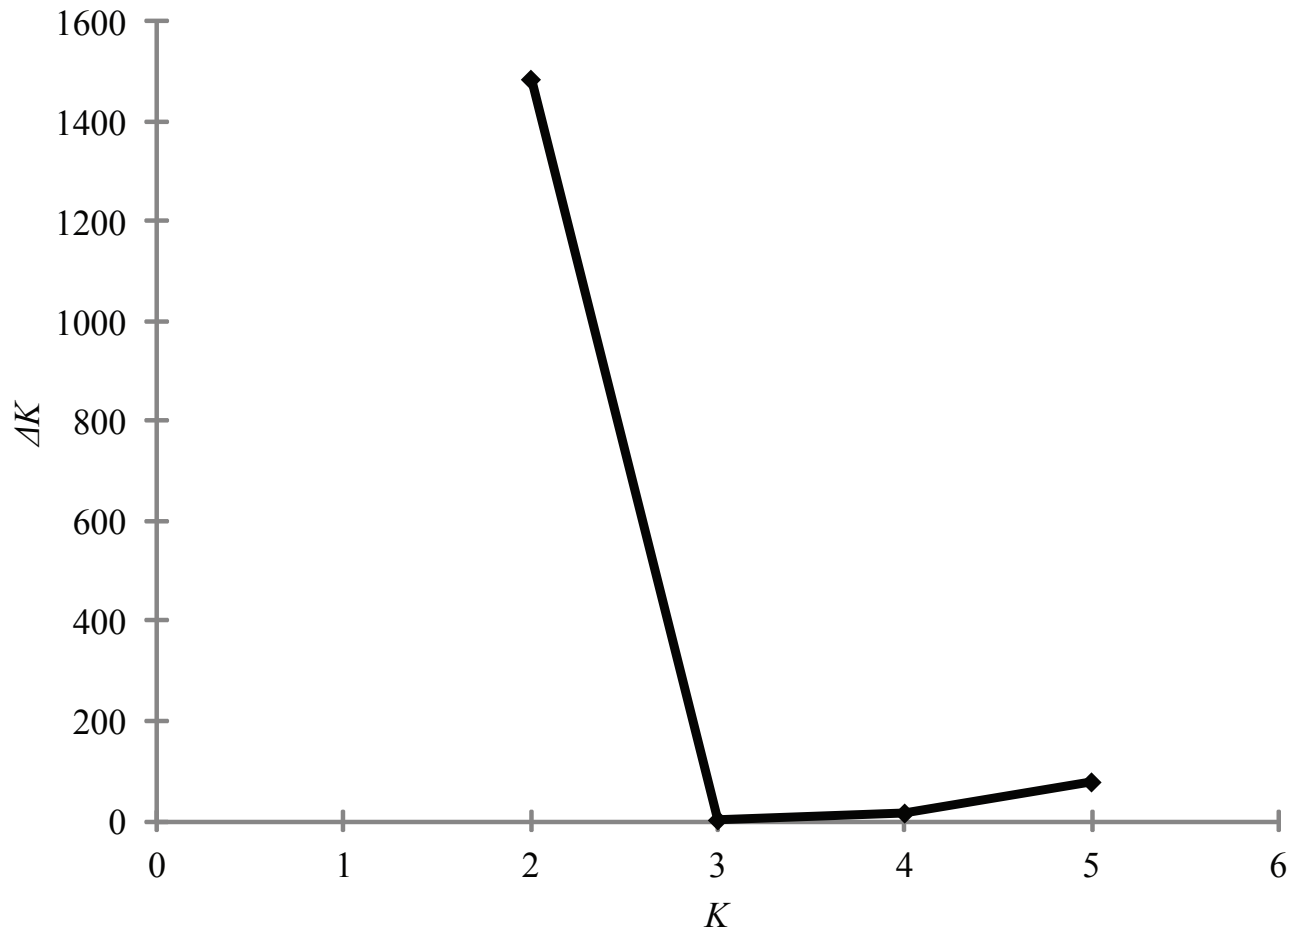

Supplement: pntd.0001381.s002.pdf [file pntd.0001381.s002.pdf]
