# Supplementary material for: Epidemiological Tracking and Population Assignment of the Non-Clonal Bacterium, Burkholderia pseudomallei
Source: PubMed Central journal article supplement (PMC3236730; doi:10.1371/journal.pntd.0001381), 2011-12-13
Supplement: pntd.0001381.s003.pdf [file pntd.0001381.s003.pdf]

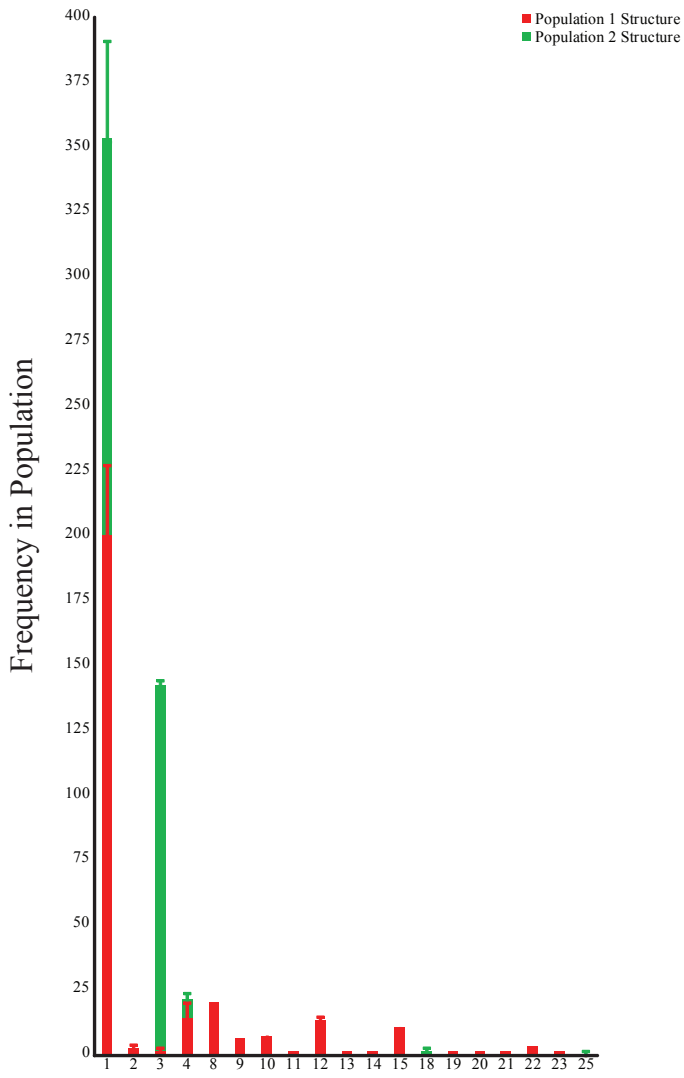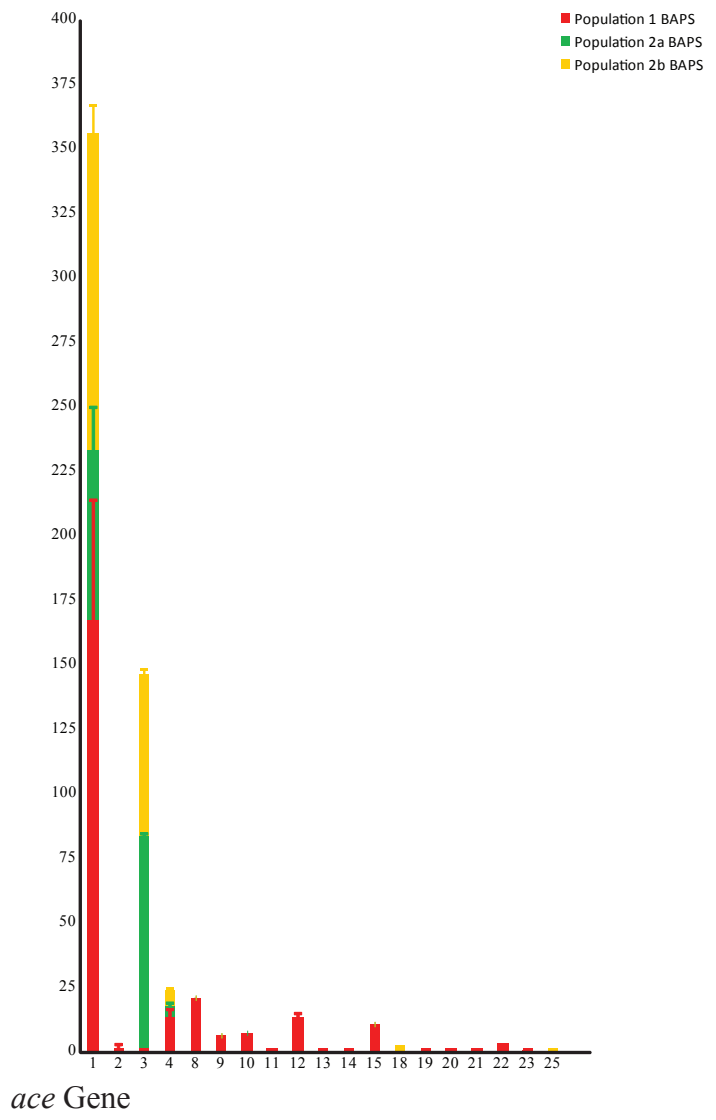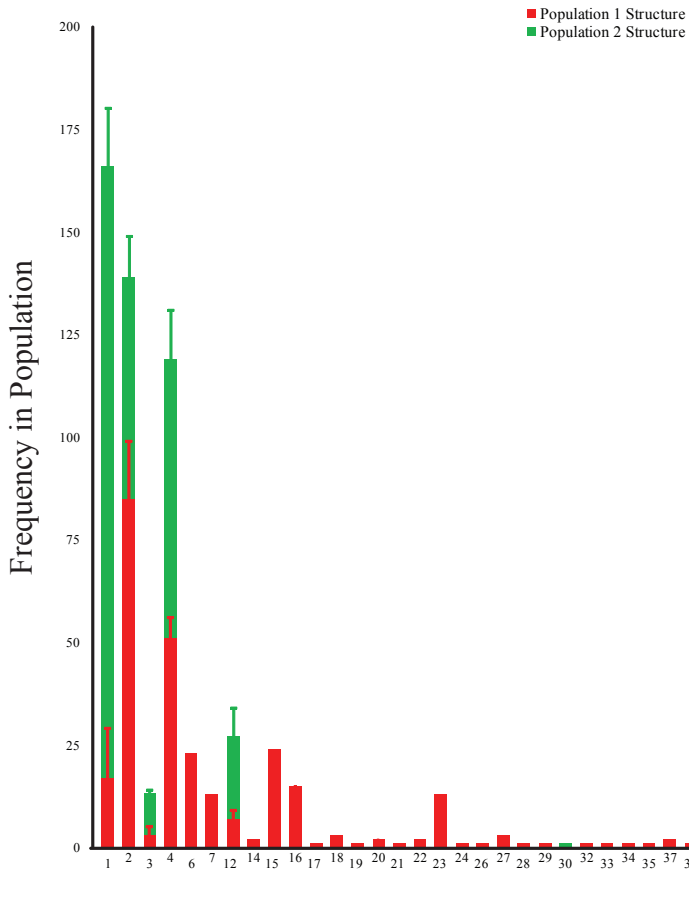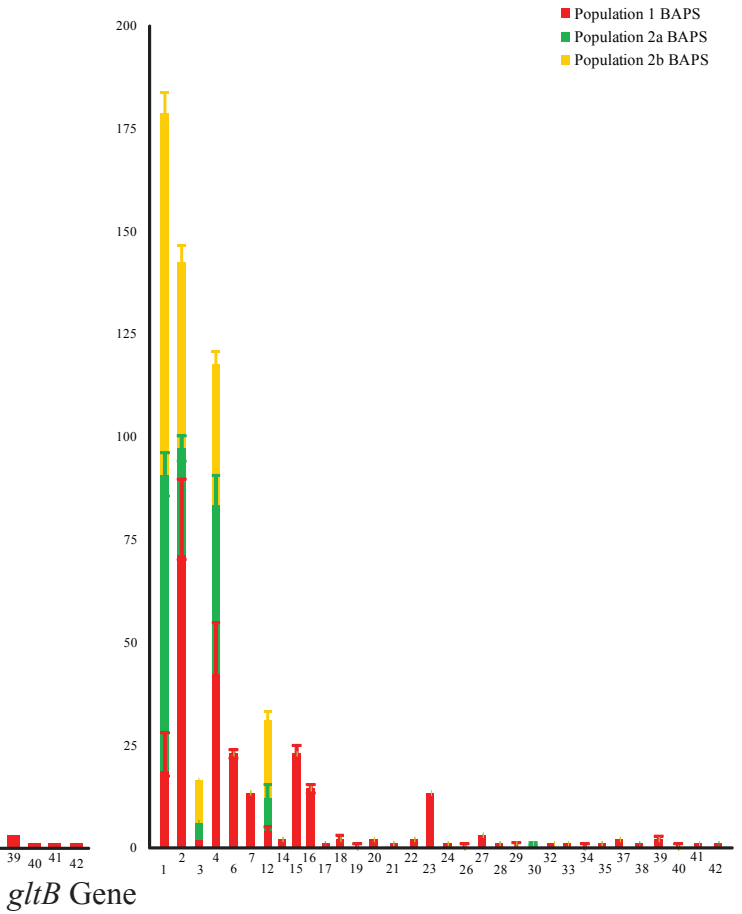

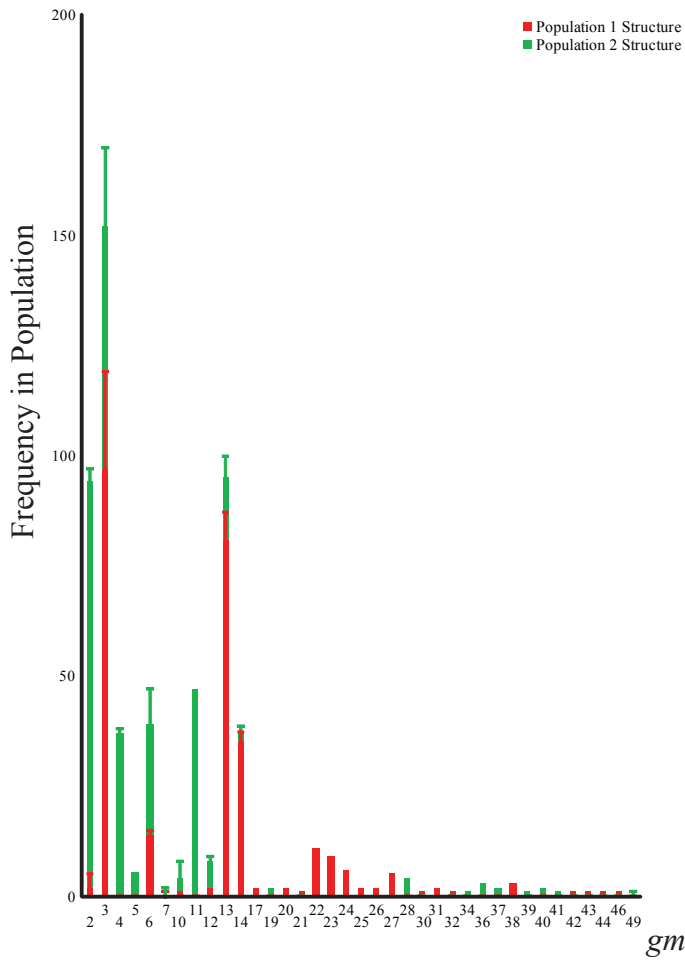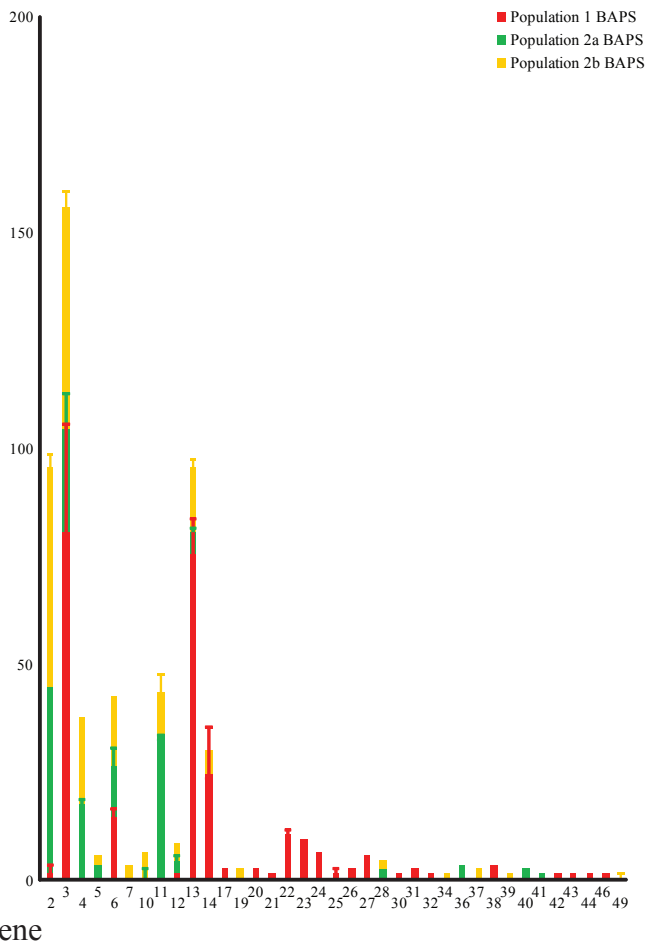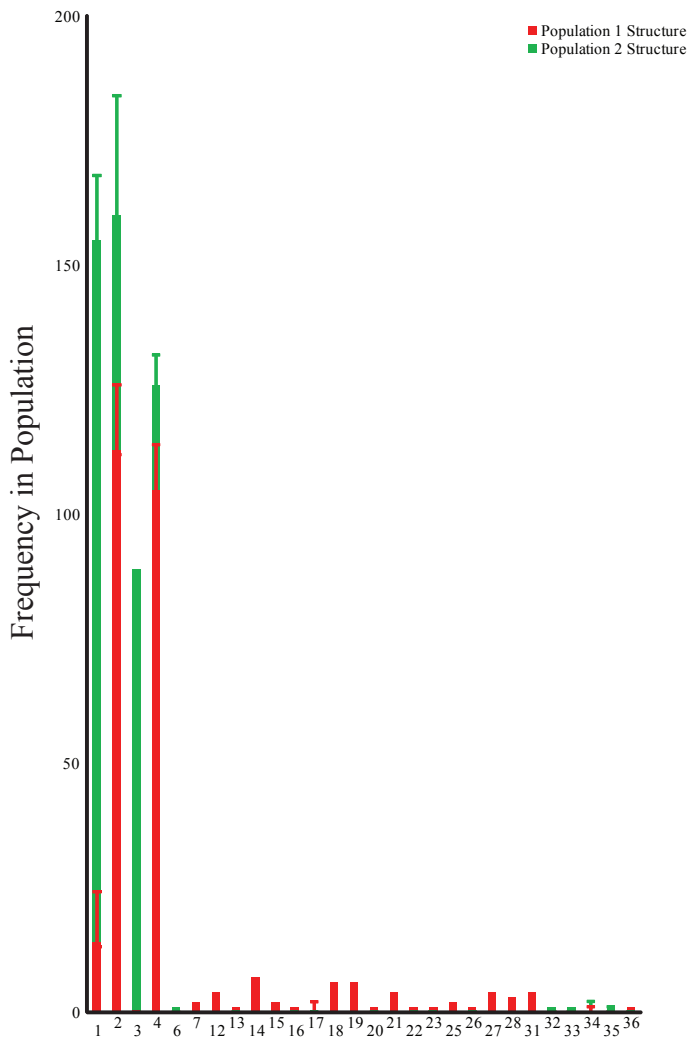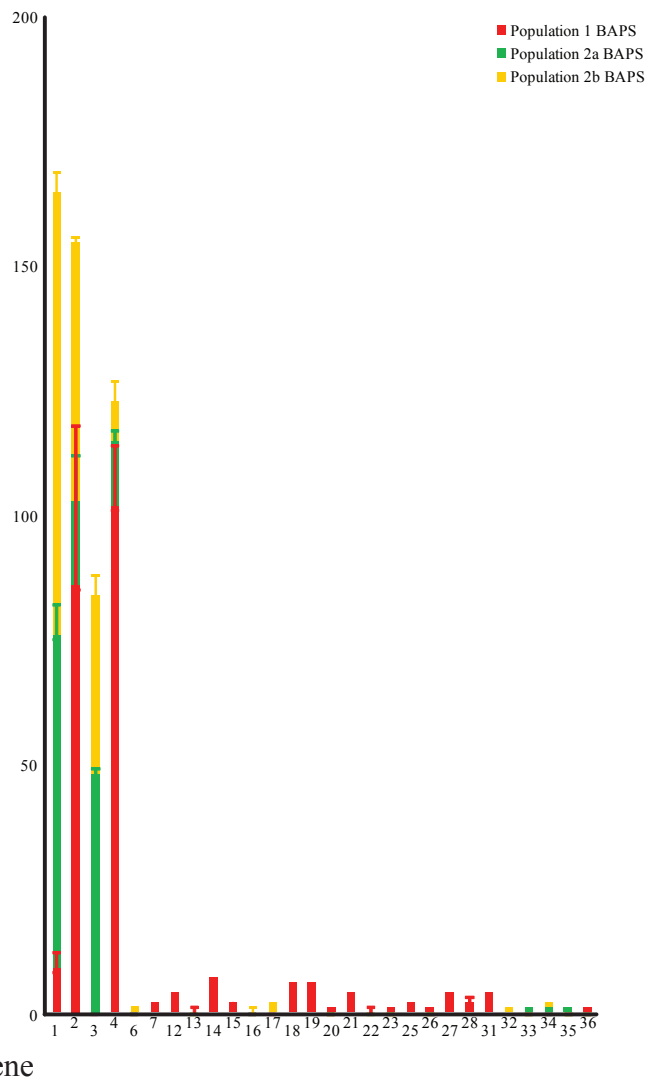

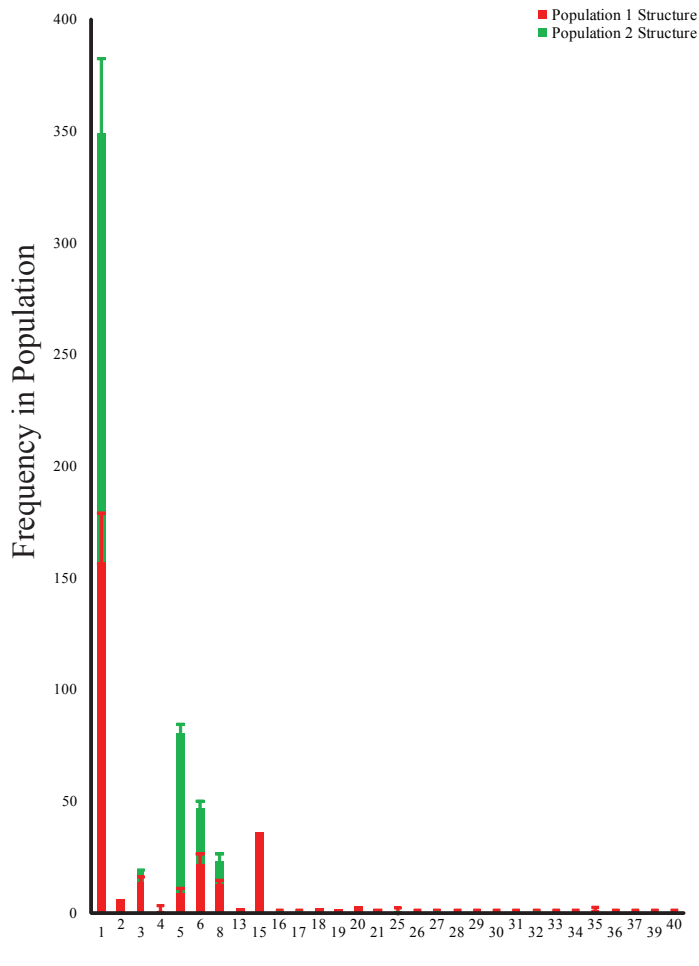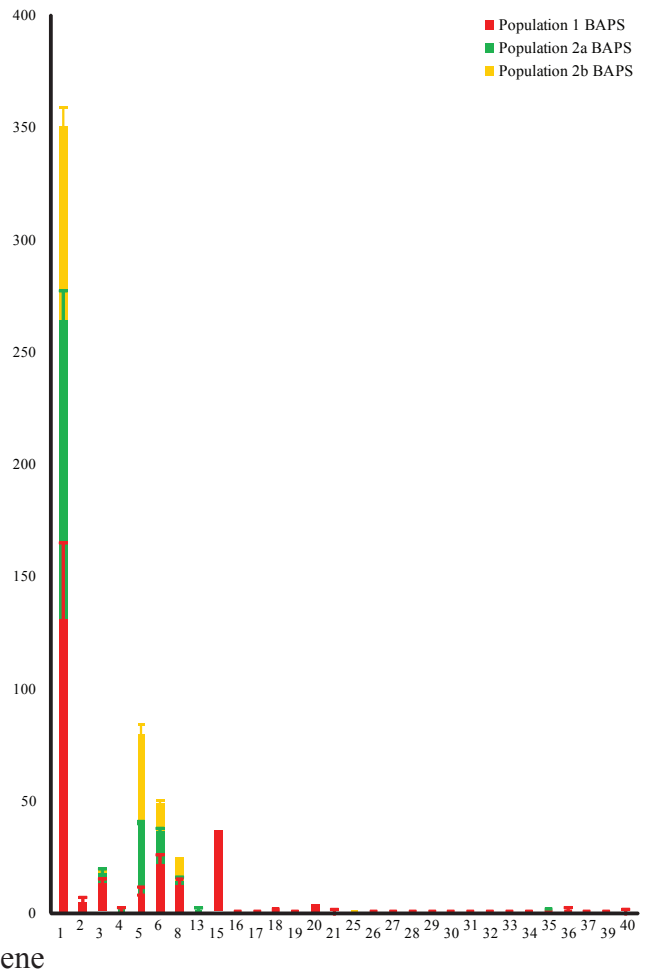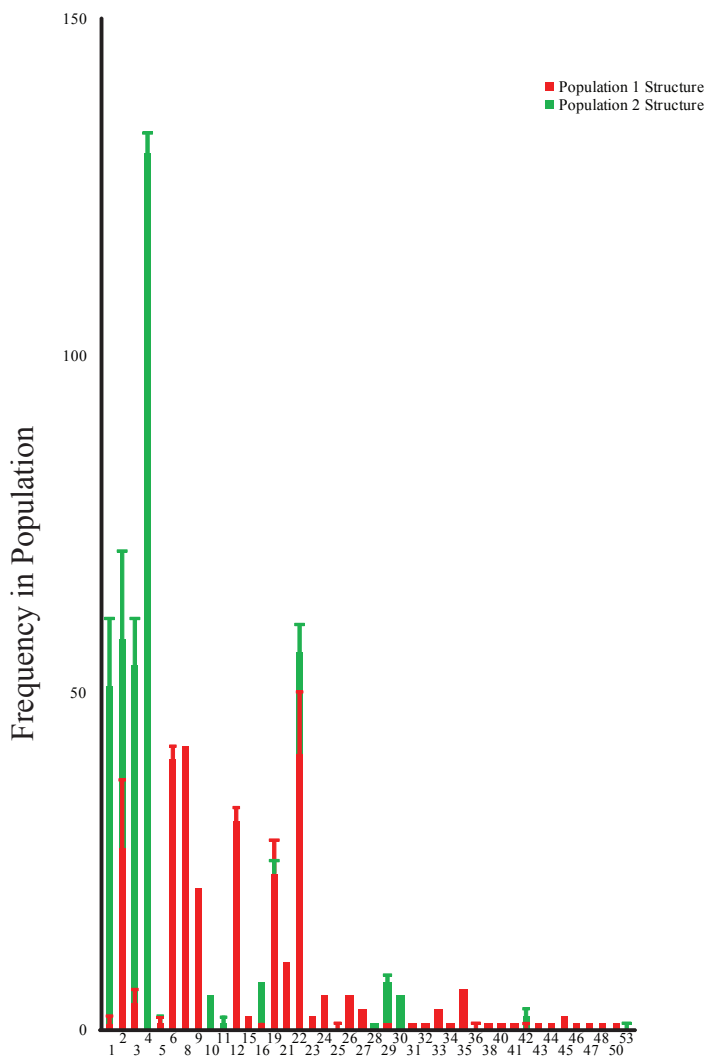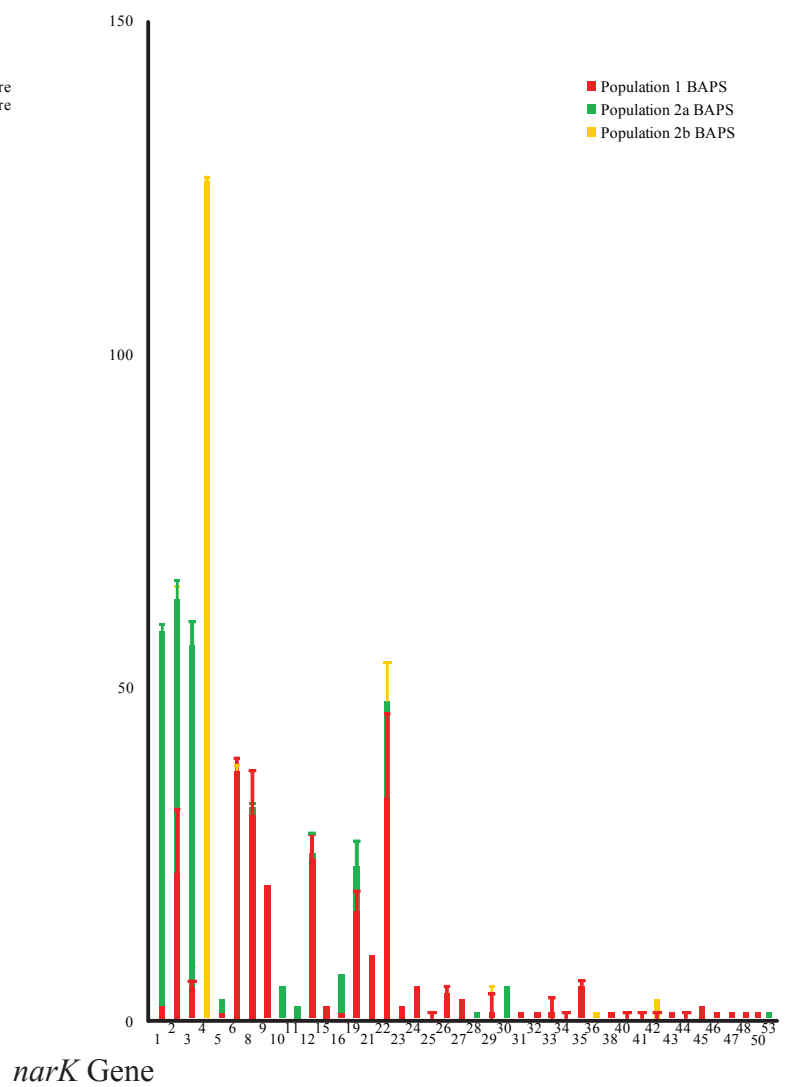

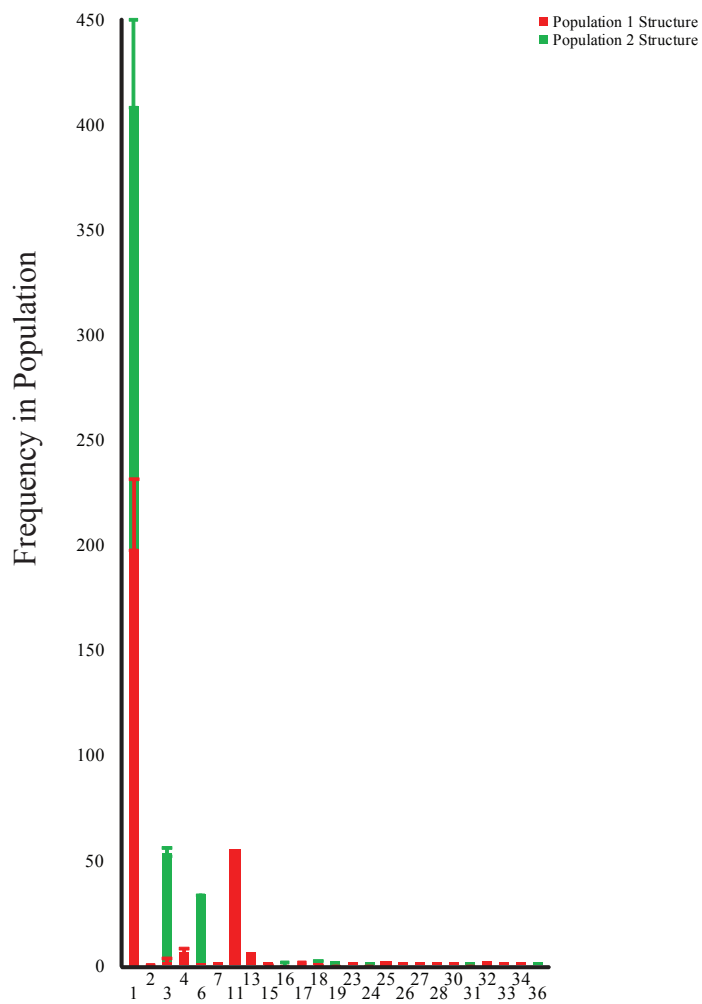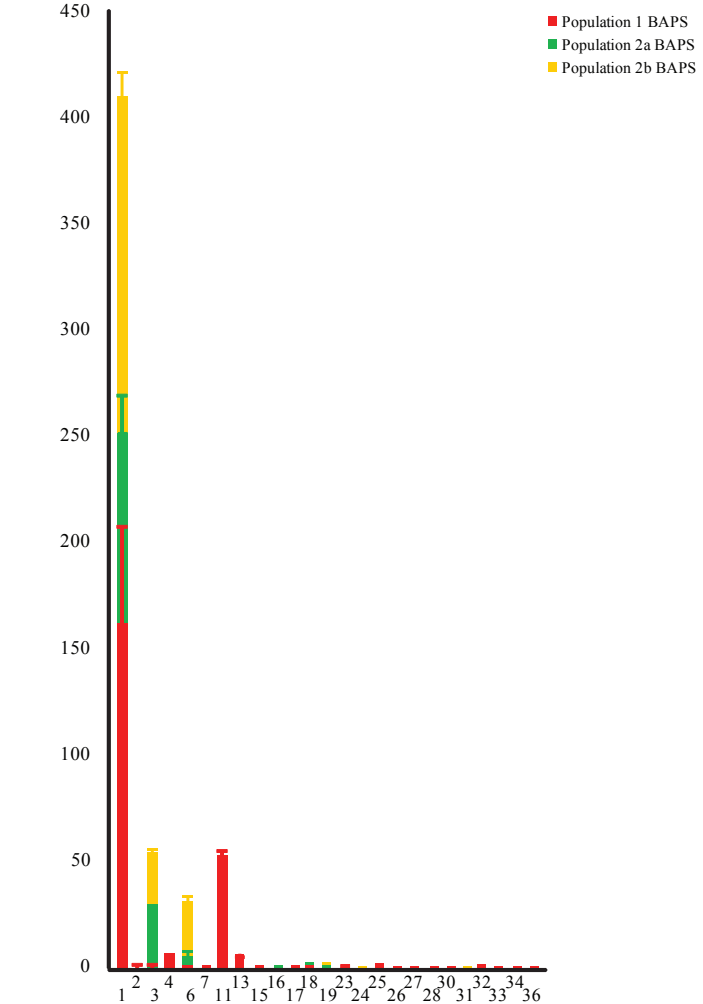

*ndh* Gene
